# Supplementary material
Source: Springer Nature journal article supplement (https://www.springermedizin.de/resource/supplementary/12872_2006_123_MOESM1_ESM.pdf/9431070)

0.1%

8.6%

FL1-Height (3) vs FL2-Height (4)

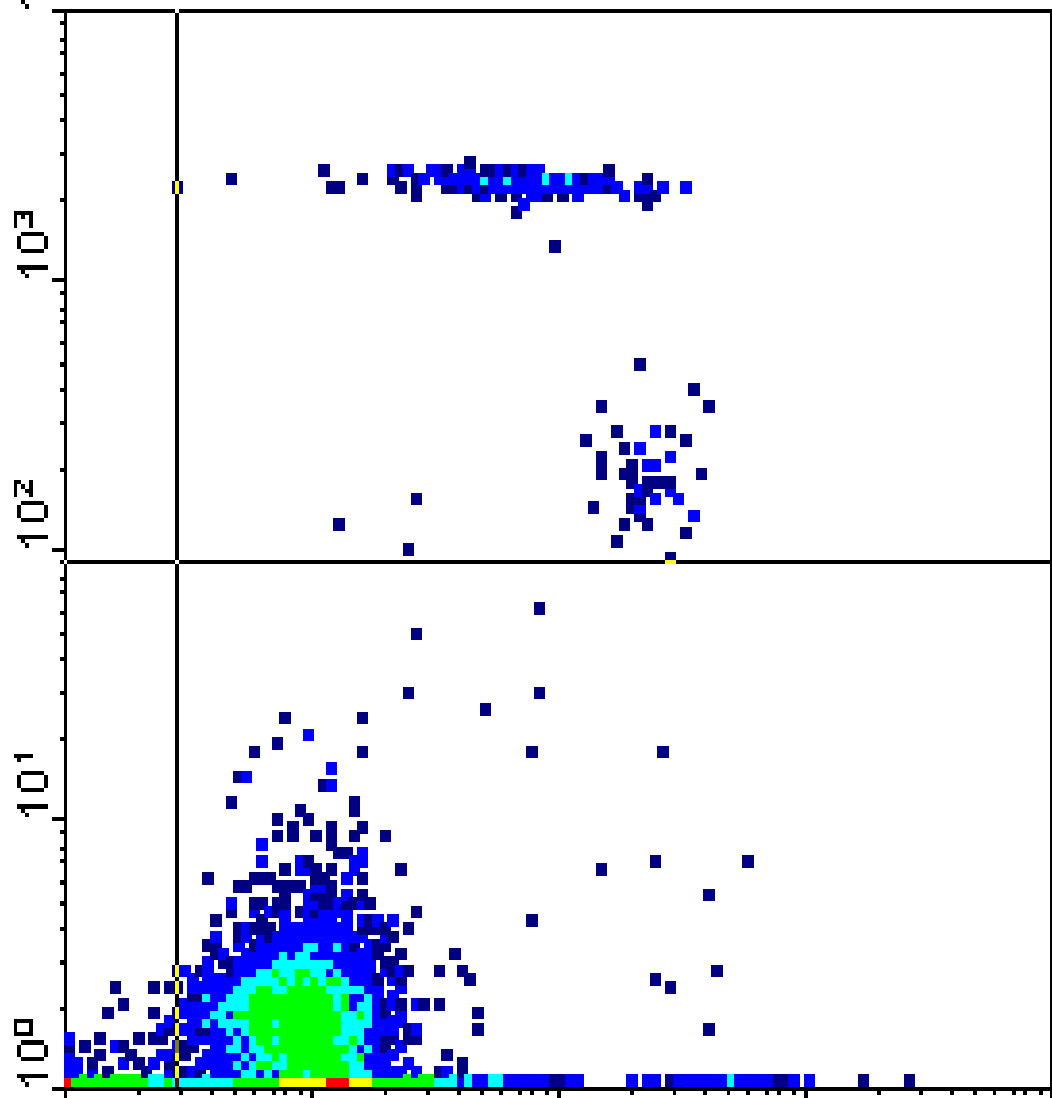

7.9%

83.4%

CD 68

Supplement: MOESM1 [file 9431070]
